# Supplementary material for: The Prediction and Prognostic Significance of INPP5K Expression in Patients with Liver Cancer
Source: Hindawi journal article supplement (doi:10.1155/2020/9519235), 2020-01-01

## **Figure legends**

### **Supplementary Fig. S1 The INPP5K mRNA expression in the GSE14520 cohort.**

The validation of INPP5K mRNA expression in liver cancer and normal liver tissues was conducted by GSE14520 cohort.

### **Supplementary Fig. S2 Kaplan-Meier curves for OS according to INPP5K expression in the ICGC cohort.**

The validation of survival analysis was conducted by ICGC cohort.

**Supplementary Fig. S1**

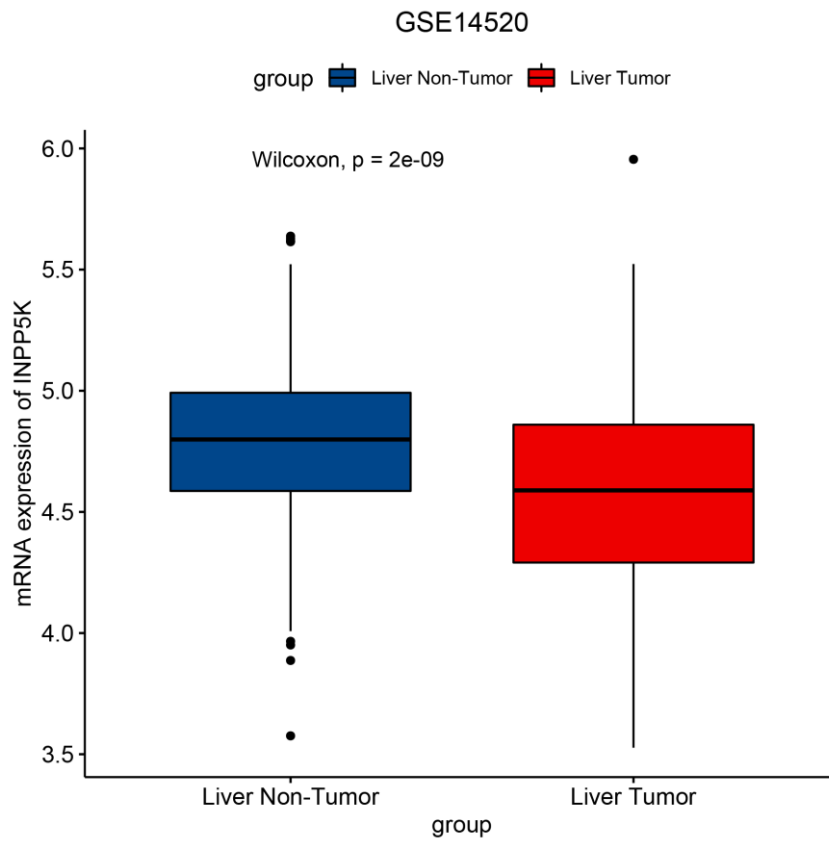

**Supplementary Fig. S2**

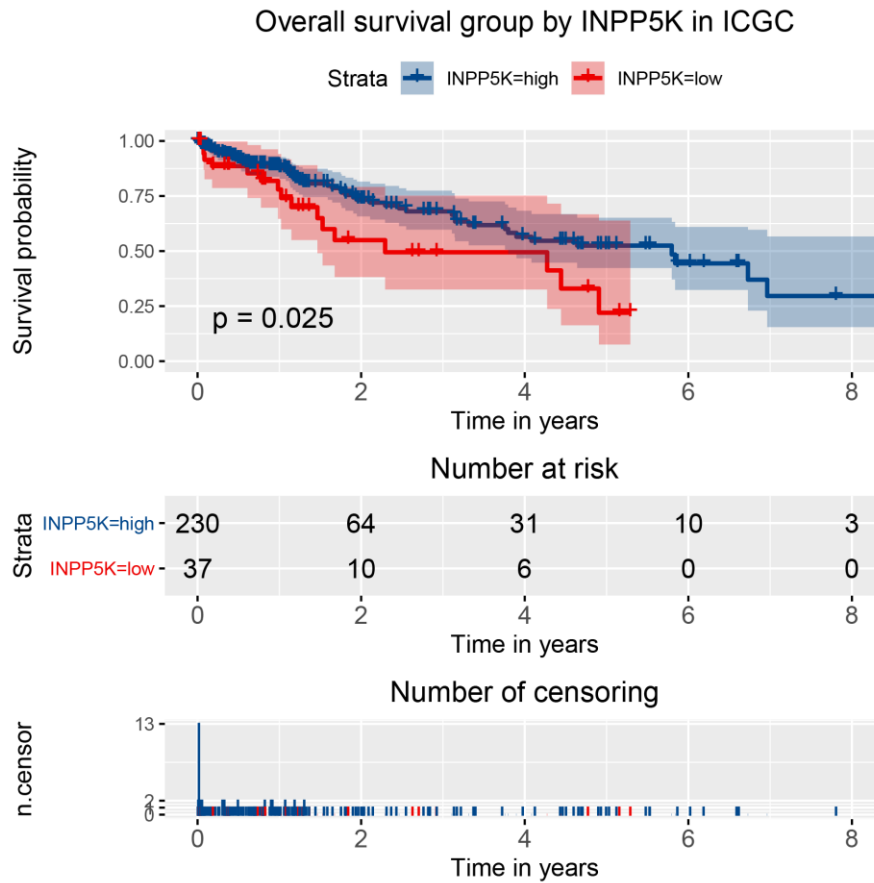

Supplement: f1 [file 9519235.f1.pdf]
